# Supplementary material
Source: publisher figshare collection journal article supplement (https://tandf.figshare.com/ndownloader/files/23086541)
Supplement: Supplementary file 1 [file 23086541]

Supplementary Table S1. **ICD-9-CM diagnoses according to ICF body function categories**

| **ICF body function chapter** | **ICD-9-CM Diagnoses** | **Most prevalent diagnosis in the chapter** |
| --- | --- | --- |
| 1. Mental functions | 295.x, 297.1, 298.8 | Schizophrenia |
| 2. Sensory functions and pain | 382.0, 384.2, 384.8 – 384.9, 389.0 – 389.2,389.7 – 389.9,872.6 – 872.7 | Hearing loss |
| 3. Voice and speech functions | 140.X–149.X, 160.X, 161.X, 162.X, 195.0 | Head and neck cancer |
| 4. Functions of the cardiovascular, hematological, immunological, and respiratory systems | 398.9, 402.x,404.0 – 404.1,404.9,415.0,416.9, 425.4, 428.x, 518.4, 786.0 | Congestive heart failure |
| 5. Functions of the digestive, metabolic, and endocrine systems | 571.x | Liver cirrhosis |
| 6. Genitourinary and reproductive functions | 250.4, 274.1, 403.x, 404.x, 440.1, 442.1,453.3, 572.4, 584.x, 585, 586, 587, 592, 593, 593.9, 753.0 – 753.1, 753.3, 791.0, 866.0 – 866.1 | Chronic kidney disease |
| 7. Neuromusculoskeletal and movement-related functions | 430 - 438 | Stroke |
| 8. Functions of the skin and related structures | 940.x-949.x | Burn |
